# Supplementary material for: The eINTACT method for studying nuclear changes in host plant cells targeted by bacterial effectors in native infection contexts
Source: Springer Nature journal article supplement (doi:10.1038/s41596-023-00879-8), 2023-09-11

## Reporting Summary

Nature Portfolio wishes to improve the reproducibility of the work that we publish. This form provides structure for consistency and transparency in reporting. For further information on Nature Portfolio policies, see our [Editorial Policies](#) and the [Editorial Policy Checklist](#).

Please do not complete any field with "not applicable" or n/a. Refer to the help text for what text to use if an item is not relevant to your study.

For final submission: please carefully check your responses for accuracy; you will not be able to make changes later.

### Statistics

For all statistical analyses, confirm that the following items are present in the figure legend, table legend, main text, or Methods section.

- | n/a                              | Confirmed                                                                                                                                                                                                                                                  |
|----------------------------------|------------------------------------------------------------------------------------------------------------------------------------------------------------------------------------------------------------------------------------------------------------|
| <input checked="" type="radio"/> | The exact sample size ( $n$ ) for each experimental group/condition, given as a discrete number and unit of measurement                                                                                                                                    |
| <input checked="" type="radio"/> | A statement on whether measurements were taken from distinct samples or whether the same sample was measured repeatedly                                                                                                                                    |
| <input checked="" type="radio"/> | The statistical test(s) used AND whether they are one- or two-sided<br><i>Only common tests should be described solely by name; describe more complex techniques in the Methods section.</i>                                                               |
| <input checked="" type="radio"/> | A description of all covariates tested                                                                                                                                                                                                                     |
| <input checked="" type="radio"/> | A description of any assumptions or corrections, such as tests of normality and adjustment for multiple comparisons                                                                                                                                        |
| <input type="radio"/>            |                                                                                                                                                                                                                                                            |
| <input checked="" type="radio"/> | A full description of the statistical parameters including central tendency (e.g. means) or other basic estimates (e.g. regression coefficient) AND variation (e.g. standard deviation) or associated estimates of uncertainty (e.g. confidence intervals) |
| <input checked="" type="radio"/> | For null hypothesis testing, the test statistic (e.g. $F$ , $t$ , $r$ ) with confidence intervals, effect sizes, degrees of freedom and $P$ value noted<br><i>Give <math>P</math> values as exact values whenever suitable.</i>                            |
| <input checked="" type="radio"/> | For Bayesian analysis, information on the choice of priors and Markov chain Monte Carlo settings                                                                                                                                                           |
| <input checked="" type="radio"/> | For hierarchical and complex designs, identification of the appropriate level for tests and full reporting of outcomes                                                                                                                                     |
| <input checked="" type="radio"/> | Estimates of effect sizes (e.g. Cohen's $d$ , Pearson's $r$ ), indicating how they were calculated                                                                                                                                                         |

*Our web collection on [statistics for biologists](#) contains articles on many of the points above.*

### Software and code

Policy information about [availability of computer code](#)

|                 |                                                                          |
|-----------------|--------------------------------------------------------------------------|
| Data collection | Microscopy images were taken by a Zeiss LSM 880 imaging system.          |
| Data analysis   | ImageJ software (version 2.0.0-rc-69/1.52p) was used for image analysis. |

For manuscripts utilizing custom algorithms or software that are central to the research but not yet described in published literature, software must be made available to editors and reviewers. We strongly encourage code deposition in a community repository (e.g. GitHub). See the Nature Portfolio [guidelines for submitting code & software](#) for further information.

### Data

Policy information about [availability of data](#)

All manuscripts must include a [data availability statement](#). This statement should provide the following information, where applicable:

- Accession codes, unique identifiers, or web links for publicly available datasets
- A description of any restrictions on data availability
- For clinical datasets or third party data, please ensure that the statement adheres to our [policy](#)

DATA AVAILABILITY: All data supporting this protocol are available in the main text or supplementary materials or accessible via the original research article (<https://doi.org/10.1038/s41477-022-01302-y>). Source data for Fig. 2b, c and d are provided with this protocol.

## Field-specific reporting

---

Please select the one below that is the best fit for your research. If you are not sure, read the appropriate sections before making your selection.

Life sciences

Behavioural & social sciences

Ecological, evolutionary & environmental sciences

## Life sciences study design

---

All studies must disclose on these points even when the disclosure is negative.

|                 |                                                                                                                                                         |
|-----------------|---------------------------------------------------------------------------------------------------------------------------------------------------------|
| Sample size     | We used sample sizes that are required for yielding sufficient statistical power in the related original research article You et al. (2023) Nat. Plants |
| Data exclusions | No data were excluded from the analyses.                                                                                                                |
| Replication     | All other experiments were repeated at least twice independently to verify the reproducibility of the findings. All the replicates were successful.     |
| Randomization   | Plants were always randomly distributed during growth and after treatment. Samples were harvested randomly for data collection.                         |
| Blinding        | We are blinded to sample group allocation during all manual data collection and analysis.                                                               |

## Behavioural & social sciences study design

---

All studies must disclose on these points even when the disclosure is negative.

|                   |  |
|-------------------|--|
| Study description |  |
| Research sample   |  |
| Sampling strategy |  |
| Data collection   |  |
| Timing            |  |
| Data exclusions   |  |
| Non-participation |  |
| Randomization     |  |

## Ecological, evolutionary & environmental sciences study design

---

All studies must disclose on these points even when the disclosure is negative.

|                          |  |
|--------------------------|--|
| Study description        |  |
| Research sample          |  |
| Sampling strategy        |  |
| Data collection          |  |
| Timing and spatial scale |  |
| Data exclusions          |  |
| Reproducibility          |  |
| Randomization            |  |
| Blinding                 |  |

Did the study involve field work?  Yes  No

## Field work, collection and transport

---

|                        |  |
|------------------------|--|
| Field conditions       |  |
| Location               |  |
| Access & import/export |  |
| Disturbance            |  |

## Reporting for specific materials, systems and methods

---

We require information from authors about some types of materials, experimental systems and methods used in many studies. Here, indicate whether each material, system or method listed is relevant to your study. If you are not sure if a list item applies to your research, read the appropriate section before selecting a response.

## Materials & experimental systems

- n/a | Involved in the study
- Antibodies
  - Eukaryotic cell lines
  - Palaeontology and archaeology
  - Animals and other organisms
  - Human research participants
  - Clinical data
  - Dual use research of concern

## Methods

- n/a | Involved in the study
- ChIP-seq
  - Flow cytometry
  - MRI-based neuroimaging

## Antibodies

Antibodies used

Validation

## Eukaryotic cell lines

Policy information about [cell lines](#)

Cell line source(s)

Authentication

Mycoplasma contamination

Commonly misidentified lines  
(See [ICLAC](#) register)

## Palaeontology and Archaeology

Specimen provenance

Specimen deposition

Dating methods

Tick this box to confirm that the raw and calibrated dates are available in the paper or in Supplementary Information.

Ethics oversight

Note that full information on the approval of the study protocol must also be provided in the manuscript.

## Animals and other organisms

Policy information about [studies involving animals](#); [ARRIVE guidelines](#) recommended for reporting animal research

Laboratory animals

Wild animals

Field-collected samples

Ethics oversight

Note that full information on the approval of the study protocol must also be provided in the manuscript.

## Human research participants

Policy information about [studies involving human research participants](#)

Population characteristics

Recruitment

Ethics oversight

Note that full information on the approval of the study protocol must also be provided in the manuscript.

## Clinical data

Policy information about [clinical studies](#)

All manuscripts should comply with the [ICMJE guidelines for publication of clinical research](#) and a completed [CONSORT checklist](#) must be included with all submissions.

|                             |                      |
|-----------------------------|----------------------|
| Clinical trial registration | <input type="text"/> |
| Study protocol              | <input type="text"/> |
| Data collection             | <input type="text"/> |
| Outcomes                    | <input type="text"/> |

## Dual use research of concern

---

Policy information about [dual use research of concern](#)

### Hazards

Could the accidental, deliberate or reckless misuse of agents or technologies generated in the work, or the application of information presented in the manuscript, pose a threat to:

| No                    | Yes                                                         |
|-----------------------|-------------------------------------------------------------|
| <input type="radio"/> | <input checked="" type="radio"/> Public health              |
| <input type="radio"/> | <input checked="" type="radio"/> National security          |
| <input type="radio"/> | <input checked="" type="radio"/> Crops and/or livestock     |
| <input type="radio"/> | <input checked="" type="radio"/> Ecosystems                 |
| <input type="radio"/> | <input checked="" type="radio"/> Any other significant area |

### Experiments of concern

Does the work involve any of these experiments of concern:

| No                    | Yes                                                                                                          |
|-----------------------|--------------------------------------------------------------------------------------------------------------|
| <input type="radio"/> | <input checked="" type="radio"/> Demonstrate how to render a vaccine ineffective                             |
| <input type="radio"/> | <input checked="" type="radio"/> Confer resistance to therapeutically useful antibiotics or antiviral agents |
| <input type="radio"/> | <input checked="" type="radio"/> Enhance the virulence of a pathogen or render a nonpathogen virulent        |
| <input type="radio"/> | <input checked="" type="radio"/> Increase transmissibility of a pathogen                                     |
| <input type="radio"/> | <input checked="" type="radio"/> Alter the host range of a pathogen                                          |
| <input type="radio"/> | <input checked="" type="radio"/> Enable evasion of diagnostic/detection modalities                           |
| <input type="radio"/> | <input checked="" type="radio"/> Enable the weaponization of a biological agent or toxin                     |
| <input type="radio"/> | <input checked="" type="radio"/> Any other potentially harmful combination of experiments and agents         |

## ChIP-seq

---

### Data deposition

- Confirm that both raw and final processed data have been deposited in a public database such as [GEO](#).
- Confirm that you have deposited or provided access to graph files (e.g. BED files) for the called peaks.

|                                                                   |                      |
|-------------------------------------------------------------------|----------------------|
| Data access links<br><i>May remain private before publication</i> | <input type="text"/> |
| Files in database submission                                      | <input type="text"/> |
| Genome browser session<br>(e.g. <a href="#">UCSC</a> )            | <input type="text"/> |

### Methodology

|                         |                      |
|-------------------------|----------------------|
| Replicates              | <input type="text"/> |
| Sequencing depth        | <input type="text"/> |
| Antibodies              | <input type="text"/> |
| Peak calling parameters | <input type="text"/> |
| Data quality            | <input type="text"/> |
| Software                | <input type="text"/> |

## Flow Cytometry

---

## Plots

Confirm that:

- The axis labels state the marker and fluorochrome used (e.g. CD4-FITC).
- The axis scales are clearly visible. Include numbers along axes only for bottom left plot of group (a 'group' is an analysis of identical markers).
- All plots are contour plots with outliers or pseudocolor plots.
- A numerical value for number of cells or percentage (with statistics) is provided.

## Methodology

Sample preparation

Instrument

Software

Cell population abundance

Gating strategy

- Tick this box to confirm that a figure exemplifying the gating strategy is provided in the Supplementary Information.

## Magnetic resonance imaging

### Experimental design

Design type

Design specifications

Behavioral performance measures

### Acquisition

Imaging type(s)

Field strength

Sequence & imaging parameters

Area of acquisition

Diffusion MRI

Used

Not used

### Preprocessing

Preprocessing software

Normalization

Normalization template

Noise and artifact removal

Volume censoring

### Statistical modeling & inference

Model type and settings

Effect(s) tested

Specify type of analysis:  Whole brain  ROI-based  Both

Statistic type for inference

(See [Eklund et al. 2016](#) )

Correction

### Models & analysis

n/a  Involved in the study

Functional and/or effective connectivity

Graph analysis

Multivariate modeling or predictive analysis

Functional and/or effective connectivity

Graph analysis

Multivariate modeling and predictive analysis

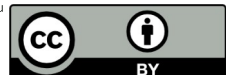

Supplement: MOESM2 [file 41596_2023_879_MOESM2_ESM11.pdf]
